# Supplementary material
Source: PubMed Central journal article supplement (PMC5925715)
Supplement: JCM.01758-17_zjm999095924s1.pdf [file JCM.01758-17_zjm999095924s1.pdf]

Table S1 Origin, year of isolation, number of isolates of *S. enterica* serovar Typhimurium and its monophasic variant used in this study

| Serovar             | Country                   | Origin              | Year of isolation | No. of isolates |     |
|---------------------|---------------------------|---------------------|-------------------|-----------------|-----|
| Typhimurium         | Japan                     | Cattle              | 1977–2016         | 624             |     |
|                     |                           | Swine               | 1972–2015         | 106             |     |
|                     |                           | Birds               | 1992–1999         | 4               |     |
|                     |                           | Meats               |                   | 0               |     |
|                     |                           | Environmental water |                   | 0               |     |
|                     |                           | Humans              |                   | 0               |     |
|                     |                           | Subtotal            |                   | 734             |     |
|                     | Italy                     | Cattle              | 2010              | 1               |     |
|                     |                           | Swine               | 2009–2012         | 3               |     |
|                     |                           | Birds               | 2011              | 2               |     |
|                     |                           | Meats               | 2009–2011         | 4               |     |
|                     |                           | Subtotal            |                   | 10              |     |
|                     | 4,[5],12:i:- <sup>a</sup> | Japan               | Cattle            | 2001–2017       | 200 |
|                     |                           |                     | Swine             | 2001–2017       | 46  |
| Birds               |                           |                     | 2000–2014         | 8               |     |
| Meats               |                           |                     | 2003–2008         | 4               |     |
| Environmental water |                           |                     | 2007              | 2               |     |
| Humans              |                           |                     | 2002–2008         | 9               |     |
| Subtotal            |                           |                     |                   | 269             |     |
| Italy               |                           | Cattle              | 2011              | 1               |     |
|                     |                           | Swine               | 2011              | 1               |     |
|                     |                           | Birds               | 2011–2012         | 3               |     |
|                     |                           | Meats               | 2010–2011         | 7               |     |
|                     |                           | Environmental water | 2012              | 2               |     |
| Subtotal            |                           |                     | 14                |                 |     |
| Total               |                           |                     |                   | 1027            |     |

<sup>a</sup>Monophasic variant of *S. enterica* serovar Typhimurium

Table S2 Origin and characteristics of *S. enterica* serovar Typhimurium and its monophasic variant subjected to whole genome sequencing

| Isolate | Serotype or antigenic formula | hierBAPS cluster | Clade | Country | Source          | Year | Phage type <sup>a</sup> | Sequence type | SG11 <sup>b</sup> | SG13 <sup>c</sup> | Transposon <sup>d</sup> | pYTI <sup>e</sup> | Antimicrobial resistance pattern <sup>f</sup> |
|---------|-------------------------------|------------------|-------|---------|-----------------|------|-------------------------|---------------|-------------------|-------------------|-------------------------|-------------------|-----------------------------------------------|
| L-3843  | 4,[5],12:i:-                  | 1                | 1     | Japan   | Human           | 2002 | UT                      | 19            | -                 | -                 | -                       | -                 | AMP, SUL, TET, SXT, GEN                       |
| L-4122  | Typhimurium                   | 1                | 1     | Japan   | Cattle          | 1993 | DT104                   | 19            | +                 | -                 | -                       | -                 | AMP, STR, SUL, CHL                            |
| L-4014  | Typhimurium                   | 1                | 1     | Japan   | Cattle          | 2007 | DT104                   | 19            | +                 | -                 | -                       | -                 | AMP, STR, SUL, CHL, NAL                       |
| L-4123  | Typhimurium                   | 1                | 1     | Japan   | Cattle          | 1994 | DT104                   | 19            | +                 | -                 | -                       | -                 | AMP, STR, SUL, CHL                            |
| L-4230  | Typhimurium                   | 1                | 1     | Japan   | Swine           | 2011 | DT104                   | 19            | +                 | -                 | -                       | -                 | AMP, STR, SUL, CHL                            |
| L-3039  | Typhimurium                   | 1                | 1     | Japan   | Crow            | 1998 | DT104                   | 19            | +                 | -                 | -                       | -                 | AMP, STR, SUL, TET, CHL                       |
| LB-18   | Typhimurium                   | 1                | 1     | Italy   | Swine           | 2010 | DT120                   | 19            | +                 | -                 | -                       | NA                | AMP, STR, TET, CHL                            |
| LB-26   | Typhimurium                   | 1                | 1     | Italy   | Cattle          | 2010 | U302                    | 19            | +                 | -                 | -                       | NA                | AMP, STR, SUL, TET, CHL                       |
| LB-25   | Typhimurium                   | 1                | 1     | Italy   | Swine           | 2011 | U302                    | 19            | +                 | -                 | -                       | NA                | AMP, STR, SUL, TET, CHL                       |
| L-4131  | Typhimurium                   | 1                | 2     | Japan   | Cattle          | 2002 | DT12                    | 2297          | -                 | -                 | -                       | NA                | Susceptible                                   |
| LB-8    | Typhimurium                   | 1                | 2     | Italy   | Swine           | 2010 | DT193                   | 19            | -                 | -                 | -                       | NA                | AMP                                           |
| L-4133  | Typhimurium                   | 1                | 2     | Japan   | Cattle          | 1990 | RDNC                    | 19            | -                 | -                 | -                       | NA                | Susceptible                                   |
| L-4132  | Typhimurium                   | 1                | 2     | Japan   | Cattle          | 1985 | RDNC                    | 19            | -                 | -                 | -                       | -                 | AMP, STR, TET, CHL, KAN, NAL, GEN             |
| L-4128  | Typhimurium                   | 1                | 2     | Japan   | Cattle          | 1992 | RDNC                    | 328           | -                 | -                 | -                       | -                 | SUL, TET                                      |
| L-4129  | Typhimurium                   | 1                | 2     | Japan   | Cattle          | 1987 | RDNC                    | 328           | -                 | -                 | -                       | -                 | Susceptible                                   |
| L-1945  | Typhimurium                   | 1                | 3     | Japan   | Society finch   | 1992 | DT193                   | 159           | -                 | -                 | -                       | -                 | TET                                           |
| LB-17   | Typhimurium                   | 1                | 3     | Italy   | Swine           | 2009 | DT120                   | 19            | -                 | -                 | -                       | -                 | AMP, TET, CHL                                 |
| L-4156  | Typhimurium                   | 1                | 3     | Japan   | Cattle          | 1986 | DT193                   | 19            | -                 | -                 | -                       | NA                | AMP, STR, SUL, TET, CHL, KAN, CFZ             |
| L-3792  | 4,[5],12:i:-                  | 1                | 3     | Japan   | Swine           | 2009 | DT27                    | 19            | -                 | -                 | -                       | -                 | AMP, STR, SUL, TET, SXT                       |
| LB-24   | Typhimurium                   | 1                | 3     | Italy   | Swine           | 2010 | U302                    | 19            | -                 | -                 | -                       | NA                | AMP, SUL, CHL, NAL                            |
| L-4256  | Typhimurium                   | 1                | 3     | Japan   | Swine           | 2011 | DT195                   | 19            | -                 | -                 | -                       | -                 | Susceptible                                   |
| L-4228  | Typhimurium                   | 1                | 3     | Japan   | Swine           | 2008 | UT                      | 19            | -                 | -                 | -                       | -                 | STR, SUL, TET, SXT                            |
| L-4204  | Typhimurium                   | 1                | 3     | Japan   | Swine           | 2008 | DT195                   | 19            | -                 | -                 | -                       | -                 | STR, SUL, TET                                 |
| L-4227  | Typhimurium                   | 1                | 3     | Japan   | Swine           | 2007 | RDNC                    | 19            | -                 | -                 | -                       | -                 | STR, SUL, TET                                 |
| L-4209  | Typhimurium                   | 1                | 3     | Japan   | Swine           | 2013 | DT12                    | 19            | -                 | -                 | -                       | -                 | Susceptible                                   |
| L-4211  | Typhimurium                   | 1                | 3     | Japan   | Cattle          | 2014 | DT12                    | 19            | -                 | -                 | -                       | NA                | Susceptible                                   |
| L-3783  | 4,[5],12:i:-                  | 2                | 4     | Japan   | Crow            | 2000 | RDNC                    | 99            | -                 | -                 | -                       | -                 | Susceptible                                   |
| L-3785  | 4,[5],12:i:-                  | 2                | 4     | Japan   | Parrot          | 2005 | RDNC                    | 99            | -                 | -                 | -                       | -                 | Susceptible                                   |
| L-3635  | 4,[5],12:i:-                  | 2                | 4     | Japan   | Cattle          | 2007 | RDNC                    | 99            | -                 | -                 | -                       | -                 | Susceptible                                   |
| L-3836  | 4,[5],12:i:-                  | 2                | 4     | Japan   | Penguin         | 2009 | RDNC                    | 99            | -                 | -                 | -                       | -                 | Susceptible                                   |
| LB-5    | 4,[5],12:i:-                  | 2                | 4     | Italy   | Sea water       | 2012 | NT                      | 99            | -                 | -                 | -                       | NA                | Susceptible                                   |
| LB-4    | 4,[5],12:i:-                  | 2                | 4     | Italy   | Heron           | 2012 | RDNC                    | 99            | -                 | -                 | -                       | NA                | Susceptible                                   |
| LB-3    | 4,[5],12:i:-                  | 2                | 4     | Italy   | Water           | 2012 | DT41                    | 99            | -                 | -                 | -                       | NA                | Susceptible                                   |
| L-3823  | 4,[5],12:i:-                  | 2                | 4     | Japan   | Human           | 2003 | DT193                   | 99            | -                 | -                 | -                       | NA                | Susceptible                                   |
| L-3828  | 4,[5],12:i:-                  | 2                | 4     | Japan   | River water     | 2007 | DT26                    | 99            | -                 | -                 | -                       | -                 | Susceptible                                   |
| L-4232  | 4,[5],12:i:-                  | 3                | 5     | Japan   | Domestic duck   | 2014 | DT8                     | 19            | -                 | -                 | -                       | -                 | Susceptible                                   |
| L-3130  | Typhimurium                   | 3                | 5     | Japan   | Domestic duck   | 1999 | DT8                     | 19            | -                 | -                 | -                       | -                 | Susceptible                                   |
| L-4153  | Typhimurium                   | 3                | 5     | Japan   | Cattle          | 2007 | DT193                   | 313           | -                 | -                 | -                       | -                 | Susceptible                                   |
| LB-16   | Typhimurium                   | 3                | 5     | Italy   | Swine           | 2009 | DT120                   | 19            | -                 | -                 | -                       | NA                | Susceptible                                   |
| LB-9    | Typhimurium                   | 3                | 5     | Italy   | Aves            | 2011 | DT193                   | 19            | -                 | -                 | -                       | NA                | Susceptible                                   |
| L-2929  | Typhimurium                   | 3                | 5     | Japan   | Domestic pigeon | 1998 | DT193                   | 19            | -                 | -                 | -                       | -                 | Susceptible                                   |
| L-4125  | Typhimurium                   | 3                | 6     | Japan   | Cattle          | 2006 | DT40                    | 19            | -                 | -                 | -                       | -                 | Susceptible                                   |
| L-4124  | Typhimurium                   | 3                | 6     | Japan   | Cattle          | 2001 | RDNC                    | 19            | -                 | -                 | -                       | -                 | Susceptible                                   |
| L-4149  | Typhimurium                   | 3                | 6     | Japan   | Cattle          | 2003 | DT41                    | 19            | -                 | -                 | -                       | -                 | TET                                           |
| L-4154  | Typhimurium                   | 3                | 6     | Japan   | Cattle          | 1980 | DT193                   | 19            | -                 | -                 | -                       | -                 | STR, SUL, TET, NAL                            |
| L-4130  | Typhimurium                   | 3                | 6     | Japan   | Cattle          | 1985 | RDNC                    | 19            | -                 | -                 | -                       | NA                | AMP, NAL                                      |
| L-4155  | Typhimurium                   | 3                | 6     | Japan   | Cattle          | 1984 | DT193                   | 19            | -                 | -                 | -                       | -                 | NAL                                           |

Continued on following page

Table S2 – Continued

| Isolate | Serotype or antigenic formula | hierBAPS cluster | Clade | Country | Source      | Year | Phage type <sup>a</sup> | Sequence type | SG11 <sup>b</sup> | SG13 <sup>c</sup> | Transposon <sup>d</sup> | pY11 <sup>e</sup> | Antimicrobial resistance pattern <sup>f</sup> |
|---------|-------------------------------|------------------|-------|---------|-------------|------|-------------------------|---------------|-------------------|-------------------|-------------------------|-------------------|-----------------------------------------------|
| L-4135  | Typhimurium                   | 3                | 7     | Japan   | Cattle      | 2003 | UT                      | 19            | –                 | –                 | –                       | +                 | AMP, STR, SUL, TET, KAN                       |
| L-4136  | Typhimurium                   | 3                | 7     | Japan   | Cattle      | 2006 | UT                      | 19            | –                 | –                 | –                       | +                 | AMP, STR, SUL, TET, KAN                       |
| L-4137  | Typhimurium                   | 3                | 7     | Japan   | Cattle      | 2006 | UT                      | 19            | –                 | –                 | –                       | +                 | AMP, STR, SUL, TET, KAN                       |
| L-4138  | Typhimurium                   | 3                | 7     | Japan   | Cattle      | 2007 | UT                      | 19            | –                 | –                 | –                       | +                 | AMP, STR, SUL, TET, KAN                       |
| L-4134  | Typhimurium                   | 3                | 7     | Japan   | Cattle      | 2006 | UT                      | 19            | –                 | –                 | –                       | +                 | AMP, STR, SUL, TET, KAN                       |
| L-4148  | Typhimurium                   | 3                | 7     | Japan   | Cattle      | 2007 | UT                      | 19            | –                 | –                 | –                       | +                 | AMP, STR, SUL, TET, KAN                       |
| L-4147  | Typhimurium                   | 3                | 7     | Japan   | Cattle      | 2007 | UT                      | 19            | –                 | –                 | –                       | +                 | AMP, STR, SUL, TET, KAN                       |
| L-4239  | Typhimurium                   | 3                | 7     | Japan   | Cattle      | 2010 | UT                      | 19            | –                 | –                 | –                       | +                 | AMP, STR, SUL, TET                            |
| L-4235  | Typhimurium                   | 3                | 7     | Japan   | Cattle      | 2013 | DT193                   | 19            | –                 | –                 | –                       | +                 | AMP, STR, SUL, TET, KAN                       |
| L-4150  | Typhimurium                   | 3                | 7     | Japan   | Cattle      | 2004 | UT                      | 19            | –                 | –                 | –                       | +                 | AMP, STR, SUL, TET, KAN                       |
| L-4238  | Typhimurium                   | 3                | 7     | Japan   | Cattle      | 2012 | UT                      | 19            | –                 | –                 | –                       | +                 | AMP, STR, SUL, TET, KAN                       |
| L-4139  | Typhimurium                   | 3                | 7     | Japan   | Cattle      | 2007 | UT                      | 19            | –                 | –                 | –                       | +                 | AMP, STR, SUL, TET, KAN                       |
| L-4152  | Typhimurium                   | 3                | 7     | Japan   | Cattle      | 2006 | UT                      | 19            | –                 | –                 | –                       | +                 | AMP, STR, SUL, TET, CHL, SXT, KAN, CFZ, CTX   |
| L-4140  | Typhimurium                   | 3                | 7     | Japan   | Cattle      | 2007 | UT                      | 19            | –                 | –                 | –                       | +                 | AMP, STR, SUL, TET, CHL, SXT, KAN, CFZ, CTX   |
| L-4151  | Typhimurium                   | 3                | 7     | Japan   | Cattle      | 2003 | UT                      | 19            | –                 | –                 | –                       | +                 | AMP, STR, SUL, TET, KAN                       |
| L-4141  | Typhimurium                   | 3                | 7     | Japan   | Cattle      | 2000 | UT                      | 19            | –                 | –                 | –                       | +                 | AMP, STR, SUL, TET, KAN                       |
| L-4144  | Typhimurium                   | 3                | 7     | Japan   | Cattle      | 2002 | UT                      | 19            | –                 | –                 | –                       | +                 | AMP, STR, SUL, TET, KAN                       |
| L-4145  | Typhimurium                   | 3                | 7     | Japan   | Cattle      | 2002 | UT                      | 19            | –                 | –                 | –                       | +                 | AMP, STR, SUL, TET, KAN                       |
| L-4146  | Typhimurium                   | 3                | 7     | Japan   | Cattle      | 2005 | UT                      | 19            | –                 | –                 | –                       | +                 | AMP, TET, KAN                                 |
| L-4142  | Typhimurium                   | 3                | 7     | Japan   | Cattle      | 2002 | UT                      | 19            | –                 | –                 | –                       | +                 | AMP, STR, SUL, TET, KAN                       |
| L-4143  | Typhimurium                   | 3                | 7     | Japan   | Cattle      | 2003 | UT                      | 19            | –                 | –                 | –                       | +                 | AMP, STR, SUL, TET, KAN                       |
| L-4260  | Typhimurium                   | 3                | 8     | Japan   | Cattle      | 2013 | RDNC                    | 19            | –                 | –                 | –                       | –                 | Susceptible                                   |
| L-4258  | Typhimurium                   | 3                | 8     | Japan   | Cattle      | 2013 | RDNC                    | 19            | –                 | –                 | –                       | –                 | Susceptible                                   |
| L-4231  | 4[5],12:i:-                   | 3                | 8     | Japan   | Swine       | 2013 | 120                     | 19            | –                 | –                 | –                       | –                 | Susceptible                                   |
| L-4229  | 4[5],12:i:-                   | 3                | 8     | Japan   | Swine       | 2008 | 120                     | 19            | –                 | –                 | –                       | –                 | Susceptible                                   |
| L-3760  | 4[5],12:i:-                   | 3                | 8     | Japan   | Cattle      | 2005 | DT120                   | 19            | –                 | –                 | –                       | –                 | Susceptible                                   |
| L-3764  | 4[5],12:i:-                   | 3                | 8     | Japan   | Human       | 2006 | DT193                   | 19            | –                 | –                 | –                       | –                 | Susceptible                                   |
| L-3765  | 4[5],12:i:-                   | 3                | 8     | Japan   | Human       | 2007 | DT193                   | 19            | –                 | –                 | –                       | –                 | Susceptible                                   |
| L-3284  | 4[5],12:i:-                   | 3                | 8     | Japan   | Poultry     | 2001 | RDNC                    | 19            | –                 | –                 | –                       | –                 | Susceptible                                   |
| L-4218  | 4[5],12:i:-                   | 3                | 8     | Japan   | Poultry     | 2002 | DT3                     | 19            | –                 | –                 | –                       | NA                | Susceptible                                   |
| L-3761  | 4[5],12:i:-                   | 3                | 8     | Japan   | Human       | 2004 | RDNC                    | 19            | –                 | –                 | –                       | NA                | Susceptible                                   |
| L-3834  | 4[5],12:i:-                   | 3                | 8     | Japan   | Human       | 2004 | RDNC                    | 19            | –                 | –                 | –                       | NA                | SUL                                           |
| L-4205  | 4[5],12:i:-                   | 3                | 8     | Japan   | Poultry     | 2008 | RDNC                    | 19            | –                 | –                 | –                       | –                 | Susceptible                                   |
| L-3840  | 4[5],12:i:-                   | 3                | 8     | Japan   | Cattle      | 2007 | RDNC                    | 19            | –                 | –                 | –                       | –                 | AMP                                           |
| L-3833  | 4[5],12:i:-                   | 3                | 8     | Japan   | Swine       | 2007 | RDNC                    | 19            | –                 | –                 | –                       | –                 | Susceptible                                   |
| L-3750  | 4[5],12:i:-                   | 3                | 8     | Japan   | Cattle      | 2003 | RDNC                    | 19            | –                 | –                 | –                       | –                 | Susceptible                                   |
| L-3751  | 4[5],12:i:-                   | 3                | 8     | Japan   | Cattle      | 2008 | RDNC                    | 19            | –                 | –                 | –                       | –                 | Susceptible                                   |
| L-4210  | 4[5],12:i:-                   | 3                | 8     | Japan   | Cattle      | 2013 | U291                    | 19            | –                 | –                 | –                       | –                 | AMP, CFZ, CTX, FOX                            |
| L-3822  | 4[5],12:i:-                   | 3                | 8     | Japan   | Human       | 2008 | RDNC                    | 19            | –                 | –                 | –                       | –                 | Susceptible                                   |
| L-3825  | 4[5],12:i:-                   | 3                | 8     | Japan   | Cattle      | 2006 | RDNC                    | 19            | –                 | –                 | –                       | –                 | STR                                           |
| L-4208  | 4[5],12:i:-                   | 3                | 8     | Japan   | Swine       | 2013 | U291                    | 19            | –                 | –                 | –                       | –                 | Susceptible                                   |
| L-3824  | 4[5],12:i:-                   | 3                | 8     | Japan   | Swine       | 2005 | RDNC                    | 19            | –                 | –                 | –                       | –                 | Susceptible                                   |
| L-3829  | 4[5],12:i:-                   | 3                | 8     | Japan   | River water | 2007 | RDNC                    | 19            | –                 | –                 | –                       | –                 | AMP, SUL, SXT                                 |
| L-3826  | 4[5],12:i:-                   | 3                | 8     | Japan   | Human       | 2007 | DT26                    | 19            | –                 | –                 | –                       | –                 | Susceptible                                   |
| L-4234  | 4[5],12:i:-                   | 4                | 9     | Japan   | Swine       | 2014 | RDNC                    | 34            | –                 | +                 | –                       | NA                | AMP, STR, SUL, TET                            |
| L-4233  | 4[5],12:i:-                   | 4                | 9     | Japan   | Cattle      | 2014 | RDNC                    | 34            | –                 | +                 | –                       | –                 | AMP, STR, SUL, TET                            |

Continued on following page

Table S2—Continued

| Isolate | Serotype or antigenic formula | hierBAPS cluster | Clade | Country | Source  | Year | Phage type <sup>a</sup> | Sequence type | SGI1 <sup>b</sup> | SGI3 <sup>c</sup> | Transposon <sup>d</sup> | pYTI <sup>e</sup> | Antimicrobial resistance pattern <sup>f</sup> |
|---------|-------------------------------|------------------|-------|---------|---------|------|-------------------------|---------------|-------------------|-------------------|-------------------------|-------------------|-----------------------------------------------|
| L-4261  | 4[5],12:i:-                   | 4                | 9     | Japan   | Cattle  | 2014 | DT195                   | 34            | —                 | +                 | +                       | —                 | AMP, STR, SUL, TET, KAN                       |
| L-4259  | 4[5],12:i:-                   | 4                | 9     | Japan   | Cattle  | 2013 | RDNC                    | 34            | —                 | +                 | +                       | NA                | AMP, STR, SUL, TET                            |
| L-4257  | 4[5],12:i:-                   | 4                | 9     | Japan   | Cattle  | 2013 | RDNC                    | 34            | —                 | +                 | +                       | NA                | AMP, STR, SUL, TET                            |
| L-3841  | 4[5],12:i:-                   | 4                | 9     | Japan   | Swine   | 2009 | UT                      | 34            | —                 | +                 | —                       | NA                | AMP, STR, SUL                                 |
| L-3838  | 4[5],12:i:-                   | 4                | 9     | Japan   | Swine   | 2008 | UT                      | 34            | —                 | +                 | +                       | NA                | AMP, STR, SUL, TET                            |
| L-3837  | 4[5],12:i:-                   | 4                | 9     | Japan   | Cattle  | 2008 | UT                      | 34            | —                 | +                 | +                       | NA                | AMP, STR, SUL, TET                            |
| L-4071  | 4[5],12:i:-                   | 4                | 9     | Japan   | Cattle  | 2013 | DT193                   | 34            | —                 | +                 | +                       | NA                | AMP, STR, SUL, TET, CFZ, CTX, FEP             |
| LB-7    | 4[5],12:i:-                   | 4                | 9     | Italy   | Poultry | 2010 | DT193                   | 34            | —                 | +                 | +                       | NA                | AMP, STR, SUL, TET                            |
| LB-6    | 4[5],12:i:-                   | 4                | 9     | Italy   | Swine   | 2011 | DT193                   | 34            | —                 | +                 | +                       | NA                | AMP, STR, TET                                 |
| LB-19   | 4[5],12:i:-                   | 4                | 9     | Italy   | Swine   | 2011 | DT120                   | 34            | —                 | +                 | +                       | NA                | AMP, STR, SUL, TET                            |
| L-3844  | 4[5],12:i:-                   | 4                | 9     | Japan   | Swine   | 2002 | RDNC                    | 34            | —                 | +                 | —                       | NA                | STR, SUL                                      |
| L-3835  | 4[5],12:i:-                   | 4                | 9     | Japan   | Human   | 2007 | DT193                   | 34            | —                 | +                 | +                       | NA                | STR, SUL, TET                                 |
| L-3846  | 4[5],12:i:-                   | 4                | 9     | Japan   | Swine   | 2008 | DT193                   | 34            | —                 | +                 | +                       | NA                | STR, SUL, TET                                 |
| L-4126  | Typhimurium                   | 4                | 9     | Japan   | Cattle  | 1998 | RDNC                    | 34            | —                 | +                 | +                       | NA                | AMP, STR, SUL, TET                            |
| L-4127  | Typhimurium                   | 4                | 9     | Japan   | Cattle  | 1998 | RDNC                    | 34            | —                 | +                 | +                       | NA                | AMP, STR, SUL, TET                            |
| LB-10   | 4[5],12:i:-                   | 4                | 9     | Italy   | Swine   | 2011 | U311                    | 34            | —                 | +                 | +                       | NA                | TET                                           |
| LB-22   | 4[5],12:i:-                   | 4                | 9     | Italy   | Swine   | 2011 | U302                    | 34            | —                 | +                 | +                       | NA                | AMP, STR                                      |
| LB-13   | 4[5],12:i:-                   | 4                | 9     | Italy   | Swine   | 2011 | U311                    | 34            | —                 | +                 | +                       | NA                | AMP, STR, SUL, TET                            |
| LB-20   | 4[5],12:i:-                   | 4                | 9     | Italy   | Poultry | 2011 | U311                    | 34            | —                 | +                 | +                       | NA                | AMP, STR, SUL, TET                            |
| LB-23   | 4[5],12:i:-                   | 4                | 9     | Italy   | Cattle  | 2011 | U302                    | 34            | —                 | +                 | +                       | NA                | AMP, STR, SUL, TET, NAL                       |
| LB-14   | Typhimurium                   | 4                | 9     | Italy   | Poultry | 2011 | U311                    | 34            | —                 | +                 | +                       | NA                | AMP, STR                                      |
| LB-21   | 4[5],12:i:-                   | 4                | 9     | Italy   | Poultry | 2012 | DT120                   | 34            | —                 | +                 | +                       | NA                | AMP, STR                                      |
| LB-15   | Typhimurium                   | 4                | 9     | Italy   | Swine   | 2012 | U311                    | 34            | —                 | +                 | +                       | NA                | SUL, TET                                      |
| LB-12   | 4[5],12:i:-                   | 4                | 9     | Italy   | Cattle  | 2011 | U311                    | 34            | —                 | +                 | +                       | NA                | AMP, STR, SUL, TET                            |
| LB-11   | 4[5],12:i:-                   | 4                | 9     | Italy   | Swine   | 2011 | U311                    | 34            | —                 | +                 | —                       | NA                | Susceptible                                   |

<sup>a</sup>UT, untypable; RDNC, reacted but did not confirm.

<sup>b</sup>SGI1, *Salmonella* genomic island 1; +, presence; —, absence.

<sup>c</sup>SGI-3, *Salmonella* genomic island 3; +, presence; —, absence.

<sup>d</sup>Chromosomal composite transposon; +, presence; —, absence.

<sup>e</sup>Virulence-resistance plasmid pYTI; +, presence; —, absence; NA, not applicable due to lack of plasmid contigs.

<sup>f</sup>AMP, ampicillin; CFZ, ceftazidime; FOX, cefoxitin; CTX, ceftaxime; FEP, cefepime; CHL, chloramphenicol; STR, streptomycin; KAN, Kanamycin; GEN, gentamicin; SUL, sulfonamide;

TET, tetracycline; SXT, trimethoprim-sulfamethoxazole; NAL, nalidixic acid.

Table S3 List of reference genome sequence archives used in this study

| Strain      | BioSample    | Assembly        | RefSeq/GenBank IDs                                                                                                                                                           |
|-------------|--------------|-----------------|------------------------------------------------------------------------------------------------------------------------------------------------------------------------------|
| 798         | SAMN02604223 | GCA_000252875.1 | chromosome:NC_017046.1/CP003386.1; plasmid p798_93;NC_017054.1/CP003387.1                                                                                                    |
| I4028S      | SAMN02604137 | GCA_00022165.1  | chromosome:NC_016856.1/CP001363.1; plasmid unnamed:NC_016855.1/CP001362.1                                                                                                    |
| CFSAN001921 | SAMN01832087 | GCA_000430145.3 | chromosome:NC_021814.1/CP006048.1; plasmid unnamed:NC_021815.1/CP006050.1; plasmid unnamed3;NC_021816.1/CP006052.1                                                           |
| CVM23701    | SAMN02415273 | GCA_000170255.1 | draft genome:NZ_ABAO00000000/ABAO1000000                                                                                                                                     |
| D23580      | SAMEA2272777 | GCA_000027025.1 | chromosome:NC_016854.1/FN424405.1                                                                                                                                            |
| DT104       | SAMEA2272504 | GCA_000493675.1 | chromosome:ENC_022569.1/HE937208.1; plasmid II;NC_022570.1/HE937209.1                                                                                                        |
| DT2         | SAMEA2272227 | GCA_000493535.2 | chromosome:ENC_022344.1/HG326213.1; plasmid pSLT;NZ_LN999012.1/LN999012.1                                                                                                    |
| L-3553      | SAMD00002684 | GCA_000828595.1 | chromosome:NZ_APO14565.1/APO14565.1; plasmid pST3553;NZ_APO14566.1/APO14566.1                                                                                                |
| L12         | SAMN02604315 | GCA_000006945.2 | chromosome:NC_003197.2/AE006468.2; plasmid pSLT;NC_003277.2/AE006471.2                                                                                                       |
| SLI1344     | SAMEA3138382 | GCA_000210855.2 | chromosome:NC_016810.1/FQ312003.1; plasmid pColIB9_SLJ344;NC_017718.1/HE654725.1; plasmid pRSF1010_SLJ344;NC_017719.1/HE654726.1; plasmid pSLT_SLJ344;NC_017720.1/HE654724.1 |
| ST474       | SAMN02602988 | GCA_000188735.1 | chromosome:NC_016857.1/CP002487.1; plasmid TY474p1;NC_016858.1/CP002488.1; plasmid TY474p2;NC_016765.1/CP002489.1; plasmid TY474p3;NC_016859.1/CP002490.1                    |
| T000240     | SAMD00000683 | GCA_000283735.1 | chromosome:NC_016860.1/APO11957.1; plasmid pSTMDT12.L;NC_016861.1/APO11958.1; plasmid pSTMDT12.S;NC_016862.1/APO11959.1                                                      |
| U288        | SAMN02604233 | GCA_000380325.1 | chromosome:NC_021151.1/CP003836.1; plasmid pSTU288-1;NC_021155.1/CP004058.1; plasmid pSTU288-2;NC_021156.1/CP004059.1; plasmid pSTU288-3;NC_021157.1/CP004060.1              |
| UK-1        | SAMN02602986 | GCA_000213635.1 | chromosome:NC_016863.1/CP002614.1; plasmid pSTUK-100;NC_016864.1/CP002615.1                                                                                                  |

Table S4 List of DDBJ Sequence Read Archives under accession number DRA006240

| Isolate | BioSample    | Experiment | Replicon   |
|---------|--------------|------------|------------|
| L-3843  | SAMD00097407 | DRX099907  | Chromosome |
| L-3843  | SAMD00097407 | DRX099908  | Plasmid 1  |
| L-4122  | SAMD00097408 | DRX099909  | Chromosome |
| L-4014  | SAMD00097409 | DRX099910  | Chromosome |
| L-4123  | SAMD00097410 | DRX099911  | Chromosome |
| L-4123  | SAMD00097410 | DRX099912  | Plasmid 1  |
| L-4123  | SAMD00097410 | DRX099913  | Plasmid 2  |
| L-4230  | SAMD00097411 | DRX099914  | Chromosome |
| L-4230  | SAMD00097411 | DRX099915  | Plasmid 1  |
| L-4230  | SAMD00097411 | DRX099916  | Plasmid 2  |
| L-3039  | SAMD00097412 | DRX099917  | Chromosome |
| L-3039  | SAMD00097412 | DRX099918  | Plasmid 1  |
| L-3039  | SAMD00097412 | DRX099919  | Plasmid 2  |
| LB-18   | SAMD00097413 | DRX099920  | Whole      |
| LB-26   | SAMD00097414 | DRX099921  | Whole      |
| LB-25   | SAMD00097415 | DRX099922  | Whole      |
| L-4131  | SAMD00097416 | DRX099923  | Chromosome |
| LB-8    | SAMD00097417 | DRX099924  | Whole      |
| L-4133  | SAMD00097418 | DRX099925  | Chromosome |
| L-4132  | SAMD00097419 | DRX099926  | Chromosome |
| L-4132  | SAMD00097419 | DRX099927  | Plasmid 1  |
| L-4128  | SAMD00097420 | DRX099928  | Chromosome |
| L-4128  | SAMD00097420 | DRX099929  | Plasmid 1  |
| L-4129  | SAMD00097421 | DRX099930  | Chromosome |
| L-4129  | SAMD00097421 | DRX099931  | Plasmid 1  |
| L-4129  | SAMD00097421 | DRX099932  | Plasmid 2  |
| L-1945  | SAMD00097422 | DRX099933  | Chromosome |
| L-1945  | SAMD00097422 | DRX099934  | Plasmid 1  |
| L-1945  | SAMD00097422 | DRX099935  | Plasmid 2  |
| L-1945  | SAMD00097422 | DRX099936  | Plasmid 3  |
| LB-17   | SAMD00097423 | DRX099937  | Whole      |
| L-4156  | SAMD00097424 | DRX099938  | Chromosome |
| L-4156  | SAMD00097424 | DRX099939  | Plasmid 1  |
| L-3792  | SAMD00097425 | DRX099940  | Chromosome |
| L-3792  | SAMD00097425 | DRX099941  | Plasmid 1  |
| LB-24   | SAMD00097426 | DRX099942  | Whole      |
| L-4256  | SAMD00097427 | DRX099943  | Chromosome |
| L-4256  | SAMD00097427 | DRX099944  | Plasmid 1  |
| L-4256  | SAMD00097427 | DRX099945  | Plasmid 2  |
| L-4228  | SAMD00097428 | DRX099946  | Chromosome |
| L-4228  | SAMD00097428 | DRX099947  | Plasmid 1  |
| L-4228  | SAMD00097428 | DRX099948  | Plasmid 2  |
| L-4228  | SAMD00097428 | DRX099949  | Plasmid 3  |
| L-4228  | SAMD00097428 | DRX099950  | Plasmid 4  |
| L-4204  | SAMD00097429 | DRX099951  | Chromosome |
| L-4204  | SAMD00097429 | DRX099952  | Plasmid 1  |
| L-4204  | SAMD00097429 | DRX099953  | Plasmid 2  |
| L-4227  | SAMD00097430 | DRX099954  | Chromosome |

*Continued on following page*

Table S4 –Continued

| Isolate | BioSample    | Experiment |            |
|---------|--------------|------------|------------|
| L-4227  | SAMD00097430 | DRX099955  | Plasmid 1  |
| L-4227  | SAMD00097430 | DRX099956  | Plasmid 2  |
| L-4209  | SAMD00097431 | DRX099957  | Chromosome |
| L-4209  | SAMD00097431 | DRX099958  | Plasmid 1  |
| L-4209  | SAMD00097431 | DRX099959  | Plasmid 2  |
| L-4211  | SAMD00097432 | DRX099960  | Chromosome |
| L-3783  | SAMD00097433 | DRX099961  | Chromosome |
| L-3783  | SAMD00097433 | DRX099962  | Plasmid 1  |
| L-3783  | SAMD00097433 | DRX099963  | Plasmid 2  |
| L-3785  | SAMD00097434 | DRX099964  | Chromosome |
| L-3785  | SAMD00097434 | DRX099965  | Plasmid 1  |
| L-3785  | SAMD00097434 | DRX099966  | Plasmid 2  |
| L-3635  | SAMD00097435 | DRX099967  | Chromosome |
| L-3635  | SAMD00097435 | DRX099968  | Plasmid 1  |
| L-3635  | SAMD00097435 | DRX099969  | Plasmid 2  |
| L-3836  | SAMD00097436 | DRX099970  | Chromosome |
| L-3836  | SAMD00097436 | DRX099971  | Plasmid 1  |
| LB-5    | SAMD00097437 | DRX099972  | Whole      |
| LB-4    | SAMD00097438 | DRX099973  | Whole      |
| LB-3    | SAMD00097439 | DRX099974  | Whole      |
| L-3823  | SAMD00097440 | DRX099975  | Chromosome |
| L-3823  | SAMD00097440 | DRX099976  | Plasmid 1  |
| L-3828  | SAMD00097441 | DRX099977  | Chromosome |
| L-3828  | SAMD00097441 | DRX099978  | Plasmid 1  |
| L-3828  | SAMD00097441 | DRX099979  | Plasmid 2  |
| L-4232  | SAMD00097442 | DRX099980  | Chromosome |
| L-4232  | SAMD00097442 | DRX099981  | Plasmid 1  |
| L-4232  | SAMD00097442 | DRX099982  | Plasmid 2  |
| L-3130  | SAMD00097443 | DRX099983  | Chromosome |
| L-3130  | SAMD00097443 | DRX099984  | Plasmid 1  |
| L-3130  | SAMD00097443 | DRX099985  | Plasmid 2  |
| L-4153  | SAMD00097444 | DRX099986  | Chromosome |
| L-4153  | SAMD00097444 | DRX099987  | Plasmid 1  |
| LB-16   | SAMD00097445 | DRX099988  | Whole      |
| LB-9    | SAMD00097446 | DRX099989  | Whole      |
| L-2929  | SAMD00097447 | DRX099990  | Chromosome |
| L-2929  | SAMD00097447 | DRX099991  | Plasmid 1  |
| L-2929  | SAMD00097447 | DRX099992  | Plasmid 2  |
| L-2929  | SAMD00097447 | DRX099993  | Plasmid 3  |
| L-2929  | SAMD00097447 | DRX099994  | Plasmid 4  |
| L-4125  | SAMD00097448 | DRX099995  | Chromosome |
| L-4125  | SAMD00097448 | DRX099996  | Plasmid 1  |
| L-4124  | SAMD00097449 | DRX099997  | Chromosome |
| L-4124  | SAMD00097449 | DRX099998  | Plasmid 1  |
| L-4149  | SAMD00097450 | DRX099999  | Chromosome |
| L-4149  | SAMD00097450 | DRX100000  | Plasmid 1  |
| L-4154  | SAMD00097451 | DRX100001  | Chromosome |
| L-4154  | SAMD00097451 | DRX100002  | Plasmid 1  |

*Continued on following page*

Table S4 –Continued

| Isolate | BioSample    | Experiment |            |
|---------|--------------|------------|------------|
| L-4154  | SAMD00097451 | DRX100003  | Plasmid 2  |
| L-4130  | SAMD00097452 | DRX100004  | Chromosome |
| L-4155  | SAMD00097453 | DRX100005  | Chromosome |
| L-4155  | SAMD00097453 | DRX100006  | Plasmid 1  |
| L-4135  | SAMD00097454 | DRX100007  | Chromosome |
| L-4135  | SAMD00097454 | DRX100008  | Plasmid 1  |
| L-4136  | SAMD00097455 | DRX100009  | Chromosome |
| L-4136  | SAMD00097455 | DRX100010  | Plasmid 1  |
| L-4136  | SAMD00097455 | DRX100011  | Plasmid 2  |
| L-4137  | SAMD00097456 | DRX100012  | Chromosome |
| L-4137  | SAMD00097456 | DRX100013  | Plasmid 1  |
| L-4138  | SAMD00097457 | DRX100014  | Chromosome |
| L-4138  | SAMD00097457 | DRX100015  | Plasmid 1  |
| L-4138  | SAMD00097457 | DRX100016  | Plasmid 2  |
| L-4138  | SAMD00097457 | DRX100017  | Plasmid 3  |
| L-4134  | SAMD00097458 | DRX100018  | Chromosome |
| L-4134  | SAMD00097458 | DRX100019  | Plasmid 1  |
| L-4148  | SAMD00097459 | DRX100020  | Chromosome |
| L-4148  | SAMD00097459 | DRX100021  | Plasmid 1  |
| L-4148  | SAMD00097459 | DRX100022  | Plasmid 2  |
| L-4147  | SAMD00097460 | DRX100023  | Chromosome |
| L-4147  | SAMD00097460 | DRX100024  | Plasmid 1  |
| L-4147  | SAMD00097460 | DRX100025  | Plasmid 2  |
| L-4147  | SAMD00097460 | DRX100026  | Plasmid 3  |
| L-4239  | SAMD00097461 | DRX100027  | Chromosome |
| L-4239  | SAMD00097461 | DRX100028  | Plasmid 1  |
| L-4235  | SAMD00097462 | DRX100029  | Chromosome |
| L-4235  | SAMD00097462 | DRX100030  | Plasmid 1  |
| L-4235  | SAMD00097462 | DRX100031  | Plasmid 2  |
| L-4150  | SAMD00097463 | DRX100032  | Chromosome |
| L-4150  | SAMD00097463 | DRX100033  | Plasmid 1  |
| L-4238  | SAMD00097464 | DRX100034  | Chromosome |
| L-4238  | SAMD00097464 | DRX100035  | Plasmid 1  |
| L-4139  | SAMD00097465 | DRX100036  | Chromosome |
| L-4139  | SAMD00097465 | DRX100037  | Plasmid 1  |
| L-4152  | SAMD00097466 | DRX100038  | Chromosome |
| L-4152  | SAMD00097466 | DRX100039  | Plasmid 1  |
| L-4140  | SAMD00097467 | DRX100040  | Chromosome |
| L-4140  | SAMD00097467 | DRX100041  | Plasmid 1  |
| L-4140  | SAMD00097467 | DRX100042  | Plasmid 2  |
| L-4140  | SAMD00097467 | DRX100043  | Plasmid 3  |
| L-4151  | SAMD00097468 | DRX100044  | Chromosome |
| L-4151  | SAMD00097468 | DRX100045  | Plasmid 1  |
| L-4151  | SAMD00097468 | DRX100046  | Plasmid 2  |
| L-4141  | SAMD00097469 | DRX100047  | Chromosome |
| L-4141  | SAMD00097469 | DRX100048  | Plasmid 1  |
| L-4141  | SAMD00097469 | DRX100049  | Plasmid 2  |
| L-4144  | SAMD00097470 | DRX100050  | Chromosome |

*Continued on following page*



Table S4 –Continued

| Isolate | BioSample    | Experiment |            |
|---------|--------------|------------|------------|
| L-4144  | SAMD00097470 | DRX100051  | Plasmid 1  |
| L-4145  | SAMD00097471 | DRX100052  | Chromosome |
| L-4145  | SAMD00097471 | DRX100053  | Plasmid 1  |
| L-4145  | SAMD00097471 | DRX100054  | Plasmid 2  |
| L-4146  | SAMD00097472 | DRX100055  | Chromosome |
| L-4146  | SAMD00097472 | DRX100056  | Plasmid 1  |
| L-4146  | SAMD00097472 | DRX100057  | Plasmid 2  |
| L-4142  | SAMD00097473 | DRX100058  | Chromosome |
| L-4142  | SAMD00097473 | DRX100059  | Plasmid 1  |
| L-4143  | SAMD00097474 | DRX100060  | Chromosome |
| L-4143  | SAMD00097474 | DRX100061  | Plasmid 1  |
| L-4260  | SAMD00097475 | DRX100062  | Chromosome |
| L-4260  | SAMD00097475 | DRX100063  | Plasmid 1  |
| L-4260  | SAMD00097475 | DRX100064  | Plasmid 2  |
| L-4258  | SAMD00097476 | DRX100065  | Chromosome |
| L-4258  | SAMD00097476 | DRX100066  | Plasmid 1  |
| L-4258  | SAMD00097476 | DRX100067  | Plasmid 2  |
| L-4231  | SAMD00097477 | DRX100068  | Chromosome |
| L-4231  | SAMD00097477 | DRX100069  | Plasmid 1  |
| L-4231  | SAMD00097477 | DRX100070  | Plasmid 2  |
| L-4229  | SAMD00097478 | DRX100071  | Chromosome |
| L-4229  | SAMD00097478 | DRX100072  | Plasmid 1  |
| L-4229  | SAMD00097478 | DRX100073  | Plasmid 2  |
| L-3760  | SAMD00097479 | DRX100074  | Chromosome |
| L-3760  | SAMD00097479 | DRX100075  | Plasmid 1  |
| L-3760  | SAMD00097479 | DRX100076  | Plasmid 2  |
| L-3764  | SAMD00097480 | DRX100077  | Chromosome |
| L-3764  | SAMD00097480 | DRX100078  | Plasmid 1  |
| L-3764  | SAMD00097480 | DRX100079  | Plasmid 2  |
| L-3765  | SAMD00097481 | DRX100080  | Chromosome |
| L-3765  | SAMD00097481 | DRX100081  | Plasmid 1  |
| L-3765  | SAMD00097481 | DRX100082  | Plasmid 2  |
| L-3284  | SAMD00097482 | DRX100083  | Chromosome |
| L-3284  | SAMD00097482 | DRX100084  | Plasmid 1  |
| L-3284  | SAMD00097482 | DRX100085  | Plasmid 2  |
| L-4218  | SAMD00097483 | DRX100086  | Chromosome |
| L-3761  | SAMD00097484 | DRX100087  | Chromosome |
| L-3834  | SAMD00097485 | DRX100088  | Chromosome |
| L-3834  | SAMD00097485 | DRX100089  | Plasmid 1  |
| L-3834  | SAMD00097485 | DRX100090  | Plasmid 2  |
| L-4205  | SAMD00097486 | DRX100091  | Chromosome |
| L-4205  | SAMD00097486 | DRX100092  | Plasmid 1  |
| L-4205  | SAMD00097486 | DRX100093  | Plasmid 2  |
| L-3840  | SAMD00097487 | DRX100094  | Chromosome |
| L-3840  | SAMD00097487 | DRX100095  | Plasmid 1  |
| L-3833  | SAMD00097488 | DRX100096  | Chromosome |
| L-3833  | SAMD00097488 | DRX100097  | Plasmid 1  |
| L-3833  | SAMD00097488 | DRX100098  | Plasmid 2  |

*Continued on following page*

Table S4–Continued

| Isolate | BioSample    | Experiment |            |
|---------|--------------|------------|------------|
| L-3750  | SAMD00097489 | DRX100099  | Chromosome |
| L-3750  | SAMD00097489 | DRX100100  | Plasmid 1  |
| L-3750  | SAMD00097489 | DRX100101  | Plasmid 2  |
| L-3751  | SAMD00097490 | DRX100102  | Chromosome |
| L-3751  | SAMD00097490 | DRX100103  | Plasmid 1  |
| L-3751  | SAMD00097490 | DRX100104  | Plasmid 2  |
| L-4210  | SAMD00097491 | DRX100105  | Chromosome |
| L-4210  | SAMD00097491 | DRX100106  | Plasmid 1  |
| L-4210  | SAMD00097491 | DRX100107  | Plasmid 2  |
| L-4210  | SAMD00097491 | DRX100108  | Plasmid 3  |
| L-3822  | SAMD00097492 | DRX100109  | Chromosome |
| L-3822  | SAMD00097492 | DRX100110  | Plasmid 1  |
| L-3822  | SAMD00097492 | DRX100111  | Plasmid 2  |
| L-3575  | SAMD00097493 | DRX100112  | Chromosome |
| L-3575  | SAMD00097493 | DRX100113  | Plasmid 1  |
| L-3575  | SAMD00097493 | DRX100114  | Plasmid 2  |
| L-4208  | SAMD00097494 | DRX100115  | Chromosome |
| L-4208  | SAMD00097494 | DRX100116  | Plasmid 1  |
| L-4208  | SAMD00097494 | DRX100117  | Plasmid 2  |
| L-3824  | SAMD00097495 | DRX100118  | Chromosome |
| L-3824  | SAMD00097495 | DRX100119  | Plasmid 1  |
| L-3824  | SAMD00097495 | DRX100120  | Plasmid 2  |
| L-3829  | SAMD00097496 | DRX100121  | Chromosome |
| L-3829  | SAMD00097496 | DRX100122  | Plasmid 1  |
| L-3829  | SAMD00097496 | DRX100123  | Plasmid 2  |
| L-3825  | SAMD00097497 | DRX100124  | Chromosome |
| L-3825  | SAMD00097497 | DRX100125  | Plasmid 1  |
| L-3825  | SAMD00097497 | DRX100126  | Plasmid 2  |
| L-3825  | SAMD00097497 | DRX100127  | Plasmid 3  |
| L-3826  | SAMD00097498 | DRX100128  | Chromosome |
| L-3826  | SAMD00097498 | DRX100129  | Plasmid 1  |
| L-3826  | SAMD00097498 | DRX100130  | Plasmid 2  |
| L-4234  | SAMD00097499 | DRX100131  | Chromosome |
| L-4233  | SAMD00097500 | DRX100132  | Chromosome |
| L-4233  | SAMD00097500 | DRX100133  | Plasmid 1  |
| L-4261  | SAMD00097501 | DRX100134  | Chromosome |
| L-4261  | SAMD00097501 | DRX100135  | Plasmid 1  |
| L-4261  | SAMD00097501 | DRX100136  | Plasmid 2  |
| L-4261  | SAMD00097501 | DRX100137  | Plasmid 3  |
| L-4259  | SAMD00097502 | DRX100138  | Chromosome |
| L-4257  | SAMD00097503 | DRX100139  | Chromosome |
| L-4257  | SAMD00097503 | DRX100140  | Plasmid 1  |
| L-3841  | SAMD00097504 | DRX100141  | Chromosome |
| L-3838  | SAMD00097505 | DRX100142  | Chromosome |
| L-3837  | SAMD00097506 | DRX100143  | Chromosome |
| L-4071  | SAMD00097507 | DRX100144  | Chromosome |
| L-4071  | SAMD00097507 | DRX100145  | Plasmid 1  |
| LB-7    | SAMD00097508 | DRX100146  | Whole      |

*Continued on following page*

Table S4 –Continued

| Isolate | BioSample    | Experiment |            |
|---------|--------------|------------|------------|
| LB-6    | SAMD00097509 | DRX100147  | Whole      |
| LB-19   | SAMD00097510 | DRX100148  | Whole      |
| L-3844  | SAMD00097511 | DRX100149  | Chromosome |
| L-3835  | SAMD00097512 | DRX100150  | Chromosome |
| L-3846  | SAMD00097513 | DRX100151  | Chromosome |
| L-3846  | SAMD00097513 | DRX100152  | Plasmid 1  |
| L-3846  | SAMD00097513 | DRX100153  | Plasmid 2  |
| L-3846  | SAMD00097513 | DRX100154  | Plasmid 3  |
| L-4126  | SAMD00097514 | DRX100155  | Chromosome |
| L-4127  | SAMD00097515 | DRX100156  | Chromosome |
| LB-10   | SAMD00097516 | DRX100157  | Whole      |
| LB-22   | SAMD00097517 | DRX100158  | Whole      |
| LB-13   | SAMD00097518 | DRX100159  | Whole      |
| LB-20   | SAMD00097519 | DRX100160  | Whole      |
| LB-23   | SAMD00097520 | DRX100161  | Whole      |
| LB-14   | SAMD00097521 | DRX100162  | Whole      |
| LB-21   | SAMD00097522 | DRX100163  | Whole      |
| LB-15   | SAMD00097523 | DRX100164  | Whole      |
| LB-12   | SAMD00097524 | DRX100165  | Whole      |
| LB-11   | SAMD00097525 | DRX100166  | Whole      |

Table S5 AS-PCR primers used for the SNP genotyping

| SNP genotype | Locus of SNP                                      |                        |                    | Nucleotide            |           |         | Sequence (5'-3') <sup>f</sup> | Product size (bp)              |     |
|--------------|---------------------------------------------------|------------------------|--------------------|-----------------------|-----------|---------|-------------------------------|--------------------------------|-----|
|              | Gene                                              | Locus tag <sup>a</sup> | Gene ID            | Position <sup>b</sup> | Reference | Variant |                               |                                |     |
| 1            | <i>menF</i>                                       | STM2310                | 1253832            | 2417681               | G         | T       | Reference sequence            | GTAAGTGGTGCAGGCAGAGC           | 510 |
|              |                                                   |                        |                    |                       |           |         | Variant sequence              | GTAAGTGGTGCAGGCAGAG <u>C</u>   |     |
|              |                                                   |                        |                    |                       |           |         | SNP1_F                        | GTAAGTGGTGCAGGC <u>AA</u> ATC  |     |
|              |                                                   |                        |                    |                       |           |         | SNP1_R                        | ACGGTTGGGTGAAGCTGATT           |     |
| 2            | <i>yhdP</i><br><i>cafA</i><br>(Intergenic region) | STM3369<br>STM3370     | 1254892<br>1254893 | 3539842               | G         | C       | Reference sequence            | ATACTCGTACGGGTGCGGGT           | 493 |
|              |                                                   |                        |                    |                       |           |         | Variant sequence              | ATACTCGTACGGGTGCGG <u>C</u> T  |     |
|              |                                                   |                        |                    |                       |           |         | SNP2_F                        | ATACTCGTACGGGTGCG <u>CA</u> CT |     |
|              |                                                   |                        |                    |                       |           |         | SNP2_R                        | AGCTACGCCTGCGTAATCTG           |     |
| 3            |                                                   | STM0765                | 1252285            | 829687                | A         | C       | Reference sequence            | TGTACCCCAATGGCTATTAC           | 480 |
|              |                                                   |                        |                    |                       |           |         | Variant sequence              | TGTACCCCAATGGCTATT <u>C</u>    |     |
|              |                                                   |                        |                    |                       |           |         | SNP3_F                        | TGTACCCCAATGGCTA <u>T</u> TAC  |     |
|              |                                                   |                        |                    |                       |           |         | SNP3_R                        | TCGGTAATGGCAACCGTCAT           |     |
| 4            | <i>ydiF</i>                                       | STM1357                | 1252875            | 1439201               | A         | T       | Reference sequence            | CCGCATAGCGCCCATTTTAC           | 476 |
|              |                                                   |                        |                    |                       |           |         | Variant sequence              | CCGCATAGCGCCCATTT <u>T</u> TAC |     |
|              |                                                   |                        |                    |                       |           |         | SNP4_F                        | CCGCATAGCGCCCAT <u>T</u> TTC   |     |
|              |                                                   |                        |                    |                       |           |         | SNP4_R                        | GCCGATCTGCGTACCGTATT           |     |
| 5            | <i>ycaQ</i>                                       | STM0986                | 1252504            | 1074020               | C         | T       | Reference sequence            | CTTCTTTCGAGCTGGAACC            | 517 |
|              |                                                   |                        |                    |                       |           |         | Variant sequence              | CTTCTTTCGAGCTGGA <u>A</u> TC   |     |
|              |                                                   |                        |                    |                       |           |         | SNP5_F                        | CTTCTTTCGAGCTGGAG <u>T</u> C   |     |
|              |                                                   |                        |                    |                       |           |         | SNP5_R                        | GGCAGCGCATGATTTCAAGC           |     |
| 6            | <i>thiH</i>                                       | STM4159                | 1255685            | 4377220               | A         | C       | Reference sequence            | GACGTTGTTGATTGCCAGAG           | 515 |
|              |                                                   |                        |                    |                       |           |         | Variant sequence              | GACGTTGTTGATTGCCAG <u>G</u>    |     |
|              |                                                   |                        |                    |                       |           |         | SNP6_F                        | GACGTTGTTGATTGCC <u>AA</u> CG  |     |
|              |                                                   |                        |                    |                       |           |         | SNP6_R                        | CCATCCGCGTCAATTTTCC            |     |
| 7            | <i>cdd</i>                                        | STM2183                | 1253705            | 2279715               | T         | C       | Reference sequence            | GACGAGCAGGATCATGGCTT           | 480 |
|              |                                                   |                        |                    |                       |           |         | Variant sequence              | GACGAGCAGGATCATGG <u>C</u> T   |     |
|              |                                                   |                        |                    |                       |           |         | SNP7_F                        | GACGAGCAGGATCATGG <u>T</u> CT  |     |
|              |                                                   |                        |                    |                       |           |         | SNP7_R                        | AGACGTAGCGCAAGAAACCG           |     |
| 8            | <i>ydhM</i>                                       | STM1437                | 1252955            | 1514452               | G         | C       | Reference sequence            | CGATGATTACCGGGACCGGA           | 514 |
|              |                                                   |                        |                    |                       |           |         | Variant sequence              | CGATGATTACCGGGACCG <u>CA</u>   |     |
|              |                                                   |                        |                    |                       |           |         | SNP8_F                        | CGATGATTACCGGGAC <u>T</u> GCA  |     |
|              |                                                   |                        |                    |                       |           |         | SNP8_R                        | CGACAAGCCGCGAGTACATT           |     |
| 9            | <i>ydhC</i>                                       | STM1428                | 1252946            | 1505734               | T         | G       | Reference sequence            | GTCTCAGCGCAATCTGCATG           | 480 |
|              |                                                   |                        |                    |                       |           |         | Variant sequence              | GTCTCAGCGCAATCTGC <u>A</u> GG  |     |
|              |                                                   |                        |                    |                       |           |         | SNP9_F                        | GTCTCAGCGCAATCTG <u>T</u> AGG  |     |
|              |                                                   |                        |                    |                       |           |         | SNP9_R                        | TATTCTCAGCGCGATGGGTT           |     |

<sup>a</sup>Locus tag in reference strain *S. enterica* serovar Typhimurium LT2 (NC\_003197.1).<sup>b</sup>Nucleotide position in reference strain *S. enterica* serovar Typhimurium LT2 (NC\_003197.1).<sup>c</sup>Underline and double underline indicate the distinctive SNP of each clade and mismatch nucleotide inserted deliberately, respectively.

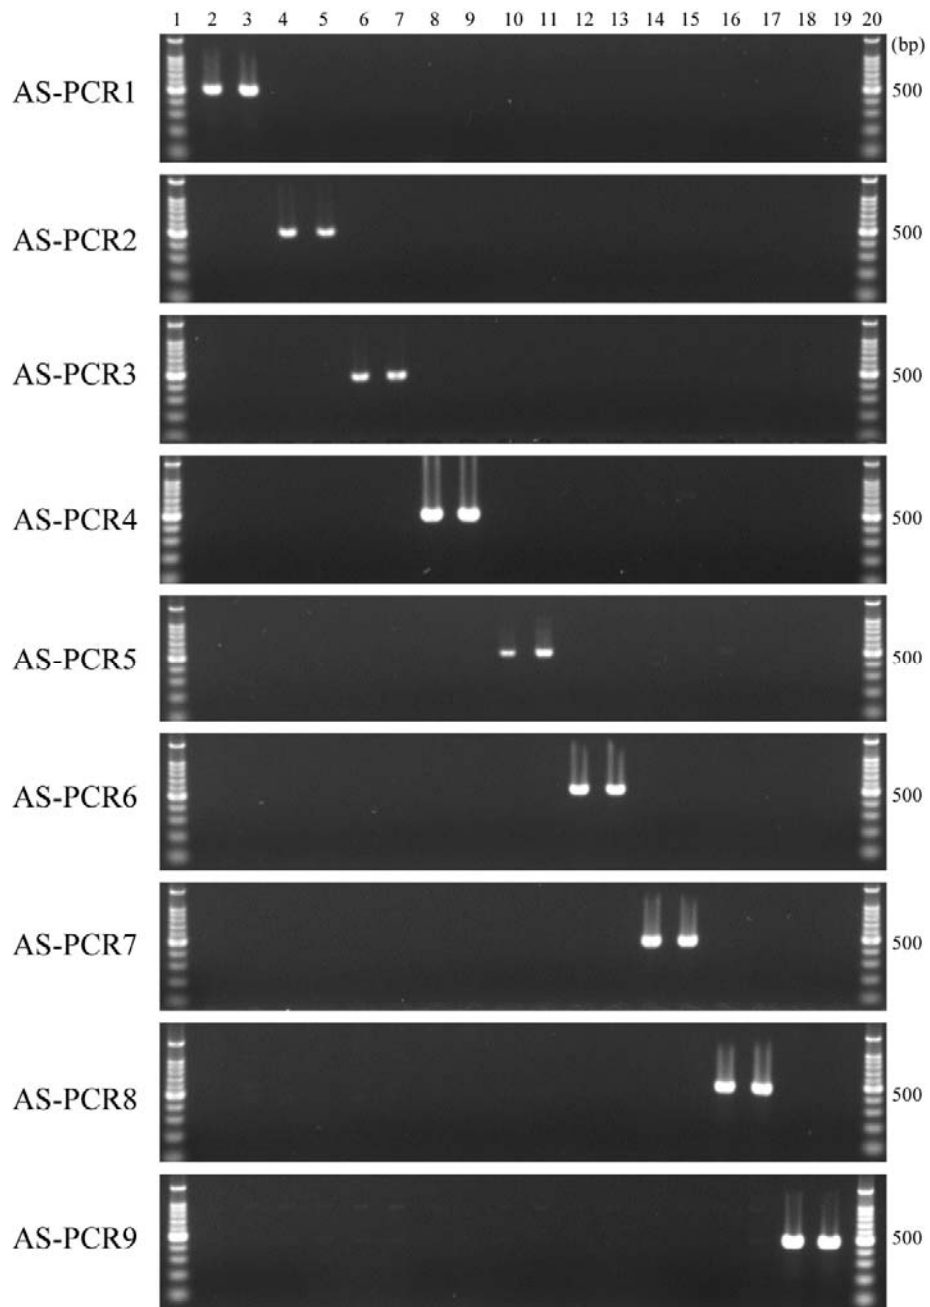

FIG S1 Detection of distinctive SNPs by nine different AS-PCRs. Lanes 1 and 20, 100 bp ladder marker; lanes 2 and 3, clade 1 isolates L-3843 and L-4122; lanes 4 and 5, clade 2 isolates L-4131 and L-4133; lanes 6 and 7, clade 3 isolates L-1995 and L-4156; lanes 8 and 9, clade 4 isolates L-3783 and L-3785; lanes 10 and 11, clade 5 isolates L-3130 and L-4232; lanes 12 and 13, clade 6 isolates L-4124 and L-4125; lanes 14 and 15, clade 7 isolates L-4135 and L-4136; lanes 16 and 17, clade 8 isolates L-4258 and L-4260; and lanes 18 and 19, clade 9 isolates L-4233 and L-4234.

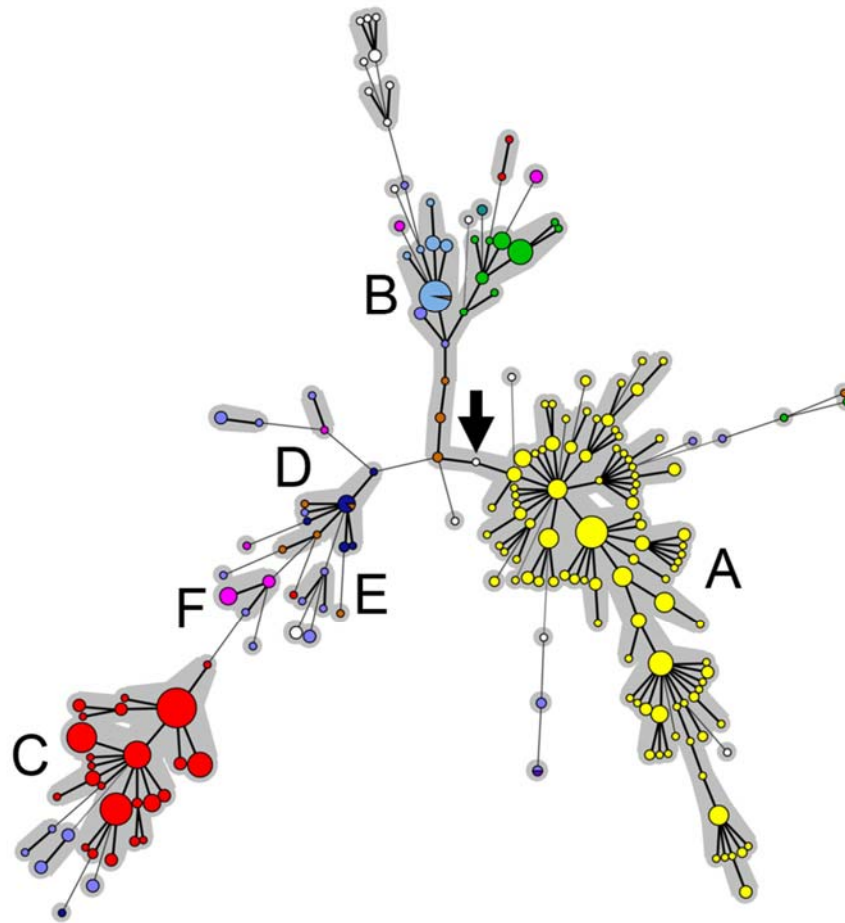

FIG S2 Minimum spanning tree based on the MLVA allelic profiles of *S. enterica* serovar Typhimurium and its monophasic variant. The 21 SNP-untypable isolates are shown as white circles. All but one of these isolates were located outside of the six MLVA clusters (A to F), which were determined in a previous study (Kurosawa et al., 2012). The remaining isolate was located between clusters A and B, as indicated by the black arrow. This analysis was performed as previously described (Kurosawa et al., 2012) using the same 562 isolates and the additional 21 SNP-untypable isolates used in this study.

## Reference

Kurosawa A, Imamura T, Tanaka K, Tamamura Y, Uchida I, Kobayashi A, Hata E, Kanno T, Akiba M, Yukawa S, Tamura Y. 2012. Molecular typing of *Salmonella enterica* serotype Typhimurium and serotype 4,5,12:i:- isolates from cattle by multiple-locus variable-number tandem-repeats analysis. *Vet Microbiol* 160:264-8.
